# Supplementary material for: A J-Protein OsDjC46 Interacts with ZFP36 to Participate in ABA-Mediated Antioxidant Defense in Rice
Source: MDPI journal article supplement (doi:10.3390/antiox11020207), 2022-01-22
Supplement: s1 [file s1]

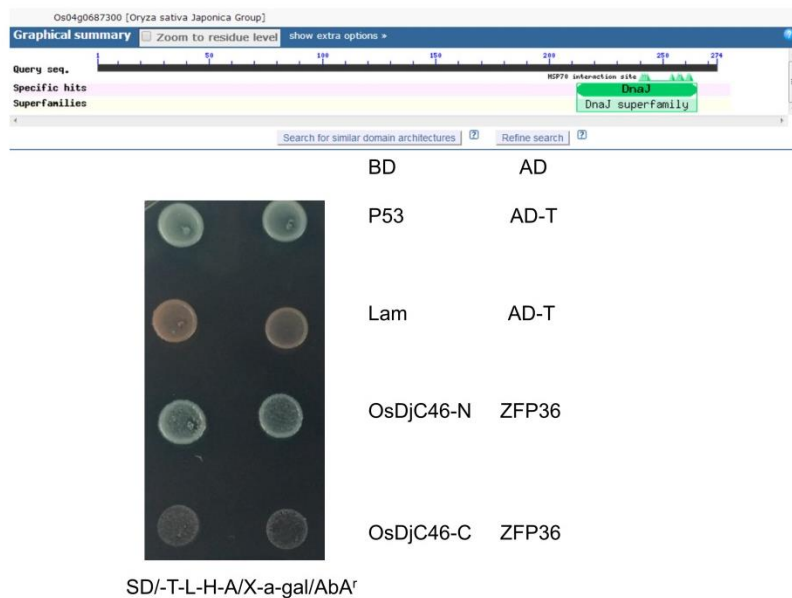

**Figure S1.** Yeast two-hybrid test. The positive control was BD-P53/AD-T while BD-Lam/AD-T was used as the negative control. SD-Leu-Trp-His-Ade/X-a-gal/AbA<sup>r</sup> was used as the selective medium. AD and BD are the activating and binding regions of transcription factors respectively; SD, synthetic dropout media. The colonies of ZFP36-AD and OsDJC46-N-BD were blue as those of the positive control in the four-deficiency medium. OsDJC46-N was connected to pGBKT7 and fused with ZFP36-AD. There was an interaction between ZFP36-AD and OsDJC46-N. ZFP36-AD could activate MEL1 in BD and make its fused colony turn blue in the tetra-deficient medium with X- $\alpha$ -Gal/AbA<sup>r</sup>. However, after fusion and fusion of OsDJC46-C-BD and ZFP36-AD, yeast colonies did not show blue, indicating that OsDJC46-C-BD and ZFP36-AD did not interact.

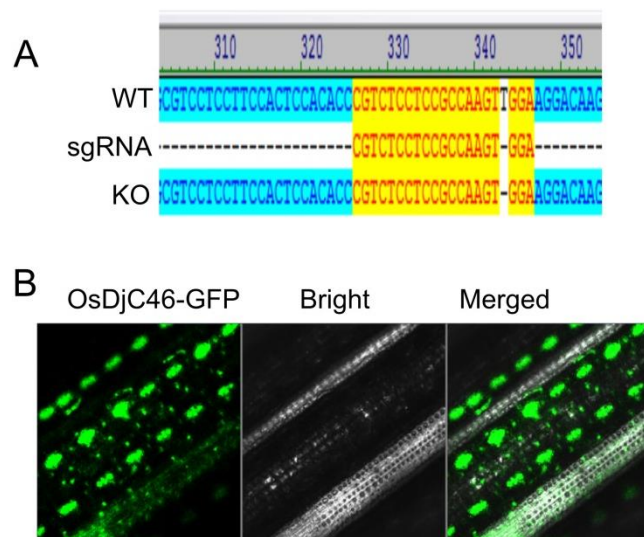

**Figure S2.** (A) is the result of mutant material identification, (B) is the result of overexpression material identification.

**Table S1.** Primers in this study.

| Abbreviation   | Sequence (5'-3')           | Description |
|----------------|----------------------------|-------------|
| <i>OsDjC46</i> | TCTTCCGTGAGGAGTATTATGTG    | Forward     |
| <i>OsDjC46</i> | TTCATCGTCACTATCGCTACAA     | Reverse     |
| <i>Actin</i>   | CGACCACCTTGATCTTCATGCTGCTA | Forward     |
| <i>Actin</i>   | CTTCATAGGAATGGAAGCTGCGGGTA | Reverse     |
